# Supplementary material for: Synthesis of BiOBr/WO3p–n heterojunctions with enhanced visible light photocatalytic activity
Source: Royal Society of Chemistry journal article supplement (doi:10.1039/c6ce00824k), 2016-01-01
Supplement: c6ce00824k1.pdf [file c6ce00824k1.pdf]

## Supporting information for

# Synthesis of BiOBr/WO<sub>3</sub> *p-n* heterojunction with enhanced visible light photocatalytic activity

Junlei Zhang, Lisha Zhang,\* Xiaofeng Shen, Pengfei Xu and Jianshe Liu\*

State Environmental Protection Engineering Center for Pollution Treatment and Control in Textile Industry, College of Environmental Science and Engineering, Donghua University, Shanghai 201620, China

\*Corresponding authors. E-mail: [lszhang@dhu.edu.cn](mailto:lszhang@dhu.edu.cn) (L.S. Zhang); [liujianshe@dhu.edu.cn](mailto:liujianshe@dhu.edu.cn) (J.S. Liu).  
Tel.: +86-21-67792548; Fax: +86-21-67792522.

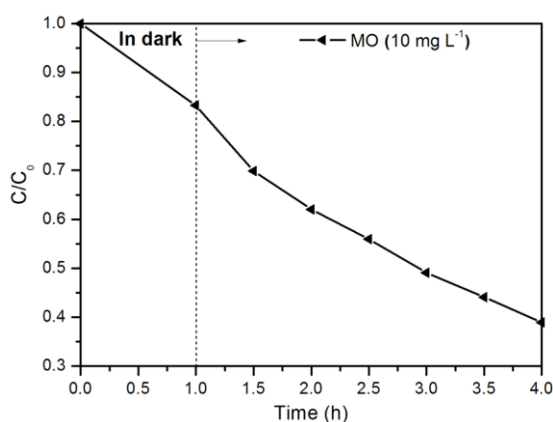

Figure S1 The adsorption and degradation efficiency of MO (10 mg L<sup>-1</sup>, 50 mL, pH =7.93) in the presence of BiOBr/WO<sub>3</sub>-1/1.

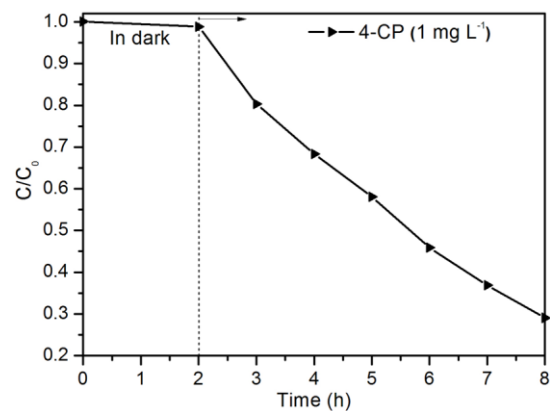

Figure S2 The adsorption and degradation efficiency of 4-CP ( $1 \text{ mg L}^{-1}$ ,  $50 \text{ mL}$ ,  $\text{pH} = 6.34$ ) versus the exposure time under visible-light irradiation ( $\lambda > 400 \text{ nm}$ ) in the presence of the  $\text{BiOBr}/\text{WO}_3$ -1/1 ( $25 \text{ mg}$ ).

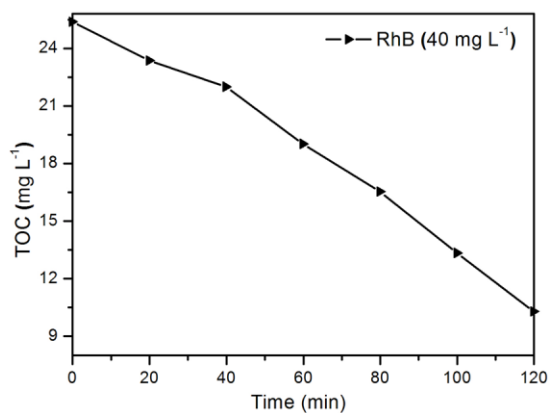

Figure S3 TOC removal during RhB ( $40 \text{ mg L}^{-1}$ ,  $100 \text{ mL}$ ) photocatalytic degradation process in the presence of the  $\text{BiOBr}/\text{WO}_3$ -1/1 ( $60 \text{ mg}$ ).

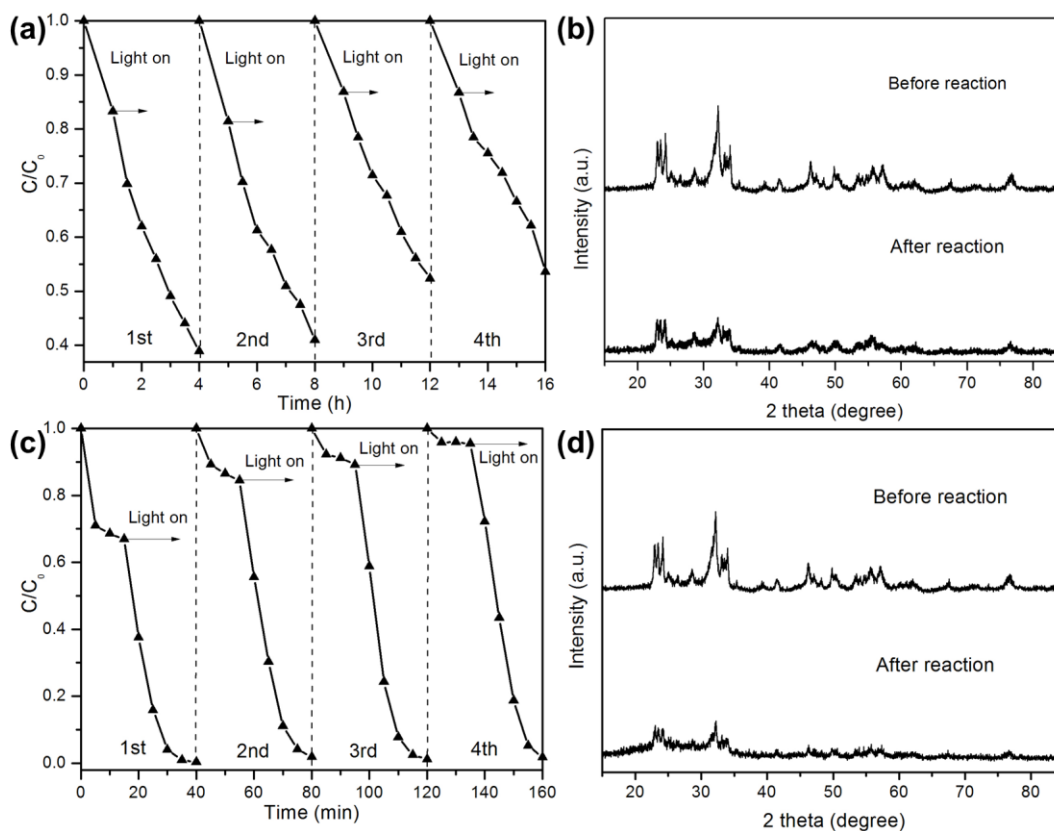

Figure S4 Cycling runs in photocatalytic degradation of (a) RhB and (c) MO over BiOBr/WO<sub>3</sub>-1/1, respectively; XRD patterns of BiOBr/WO<sub>3</sub>-1/1 before and after photocatalytic reaction of (b) RhB and (d) MO, respectively.

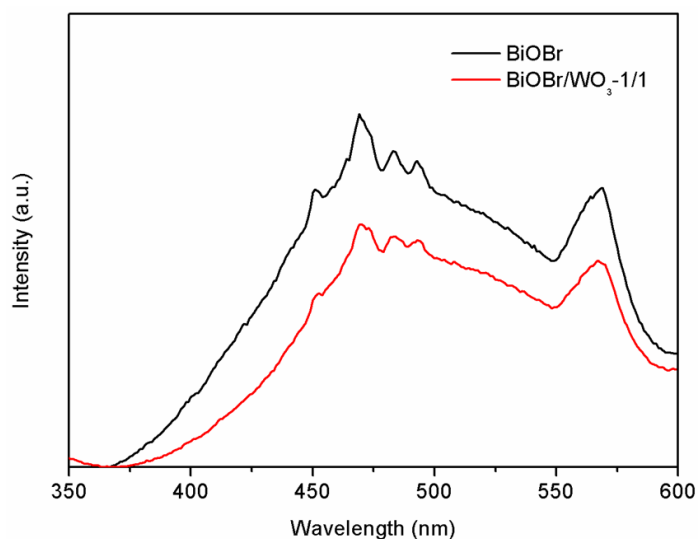

Figure S5 Photoluminescence spectra (PL) of the BiOBr and BiOBr/WO<sub>3</sub>-1/1 samples.
